# Supplementary material for: Enhancing chalcogen bonding by metal coordination
Source: Royal Society of Chemistry journal article supplement (doi:10.1039/d2dt00796g), 2022-01-01
Supplement: d2dt00796g1.pdf [file d2dt00796g1.pdf]

## Enhancing chalcogen bonding by metal coordination.

Rosa M. Gomila,<sup>a</sup> Antonio Bauzá,<sup>a</sup> and Antonio Frontera<sup>a,\*</sup>

<sup>a</sup>*Department of Chemistry, Universitat de les Illes Balears  
Ctra. de Valldemossa km 7.5, 07122 Palma de Mallorca (Spain)  
E-mail: toni.frontera@uib.es*

### Results from the CSD search

**Table S1.** List of X-ray structures exhibiting metal enhanced-Ch bonds including the CSD code, the ChB donor and acceptor atoms, the Ch...X distance (d, in Å) and the Y-C...X angle ( $\angle$ , in°).

| CSD code | ChB donor | ChB acceptor | d              | $\angle$ |
|----------|-----------|--------------|----------------|----------|
| HEPXEG   | Te        | Cl           | 3.249          | 174.5    |
| ZEYXIN   | Te        | Cl           | 3.309          | 166.8    |
| OGOAM    | Se        | Cl           | 3.341          | 174.3    |
| XUFHEM   | Se        | O            | 3.353          | 160.8    |
| ZOWYEP   | Te        | C            | 3.581          | 166.8    |
| BEJWUL   | Se        | Cl           | 3.376          | 168.0    |
| OLURIZ   | Te        | Cl           | 3.382          | 167.6    |
| QATVAK   | Te        | Cl           | 3.397          | 162.8    |
| QADDUU   | Te<br>Te  | Cl<br>Cl     | 3.401<br>3.494 | 174.7    |
| ROXFOB   | Te        | Cl           | 3.404          | 170.9    |
| WICDOD   | Se        | Cl           | 3.405          | 162.4    |
| XILFEE   | Se        | Cl           | 3.410          | 164.7    |
| XUFHIQ   | Se        | O            | 3.418          | 158.9    |
| ZOWYEP10 | Te        | C            | 3.583          | 169.5    |
| QAXKIJ   | Te        | Cl           | 3.425          | 170.3    |
| KEXSAK   | Te        | Cl           | 3.429          | 170.9    |
| XOYTOW   | Se        | Cl           | 3.431          | 167.7    |
| PUYWUC   | Se        | Cl           | 3.444          | 167.8    |
| TOQPEV   | Se        | C            | 3.450          | 157.0    |
| RUHFIM   | Te        | Cl           | 3.451          | 171.1    |
| TAFWIJ   | Se        | Cl           | 3.463          | 176.1    |
| OLUREV   | Te        | Cl           | 3.464          | 166.5    |
| WIXSEB   | Te        | C            | 3.465          | 172.5    |
| DISVIL   | Se        | Cl           | 3.470          | 159.5    |
| UCAJAM   | Se        | Cl           | 3.480          | 160.4    |

|        |    |    |       |                    |
|--------|----|----|-------|--------------------|
| EPULIM | Se | Cl | 3.482 | 161.5              |
| CIPKEU | Se | C  | 3.484 | 173.8              |
| KEBXAR | Se | Cl | 3.484 | 164.6              |
| WAVTIY | Se | Cl | 3.485 | 167.0              |
| DEVGUH | S  | Cl | 3.488 | 167.1              |
|        | Te | Cl | 3.401 |                    |
| XIJHIJ | Te | Cl | 3.509 | 174.2              |
|        |    | Br | 3.844 |                    |
| BEJWIZ | Se | C  | 3.536 | 168.6              |
| HIXCEX | Te | Cl | 3.539 | 172.9              |
| WIVZAD | Te | Cl | 3.551 | 167.7              |
| TOTRUR | Te | Cl | 3.568 | 173.8              |
| KEBXEV | Se | Cl | 3.575 | 160.6              |
| ZATMEM | Se | Cl | 3.579 | 176.7              |
| ABOREP | Te | Pt | 3.585 | 173.0              |
| TAPYEO | Te | Cl | 3.585 | 154.7              |
| EKIROG | Se | Cl | 3.589 | 165.0              |
| MULZIC | Se | Cl | 3.592 | 174.6              |
| GOYSIZ | Se | Cl | 3.618 | 152.7              |
| CODTEX | Te | Cl | 3.621 | 154.1              |
| JAGZIA | Te | Br | 3.647 | 152.3              |
| COKFIT | Se | C  | 3.658 | 176.2              |
| SIDDAL | Te | C  | 3.666 | 166.8              |
| VUGWOK | Se | Pd | 3.678 | 150.7 <sup>a</sup> |
| PUYXAJ | Se | Cl | 3.679 | 166.7              |
| NEDTAS | Se | Cl | 3.681 | 160.8              |
| QETFED | Se | Pt | 3.697 | 173.6              |
| MELJUJ | Se | Pd | 3.701 | 175.7              |
| SETFON | Se | Cl | 3.701 | 163.8              |
| CODTAT | Te | Cl | 3.706 | 151.3              |
| QETFAZ | Se | Pd | 3.708 | 170.6              |
| CUHMAV | Te | Pt | 3.715 | 166.5              |
| QADDOO | Te | Cl | 3.734 | 175.8              |
| DIZWAL | Te | Cl | 3.753 | 172.3              |
| DISWAE | Se | Cl | 3.760 | 157.7              |
| KICSIA | Se | Br | 3.787 | 169.6              |
|        | Se | Cl | 3.647 |                    |
| EKIQUL | Se | Cl | 3.795 | 168.9              |
| PDSECL | Se | Cl | 3.820 | 153.1              |
| LEQSIK | Se | Cl | 3.833 | 166.0              |
| FELPOD | Se | Cl | 3.836 | 159.4              |
| CUHMEZ | Te | Cl | 3.850 | 171.6              |
| YIZPOM | Te | Cl | 3.852 | 153.7              |
| JOZXOL | Te | I  | 3.862 | 169.2              |
| BIGDAX | Te | Cl | 3.887 | 160.5              |
| DUWMEN | Se | O  | 3.909 | 172.4              |
| CUHMOJ | Te | I  | 3.937 | 161.1              |
| REXBOL | Te | Cl | 3.937 | 152.0              |
| WACNIX | Te | Cl | 3.989 | 172.8              |
| UZACEE | Se | I  | 4.033 | 165.8              |

<sup>a</sup>Angle measured to the Cl–Pd bond centroid.

## Comparison of ChB geometric parameters between optimized and non-optimized X-ray structures.

**Table S2.** List of the geometric parameters (*d*, (in Å) and (C–Ch···X angle, ( $\angle$ , in °)) regarding the ChBs established in JOXZOL dimer. Opt. stands for optimized structure at the PBE0-D3/def2-TZVP level of theory.

| CSD code       | ChB donor | ChB acceptor | <i>d</i>    | $\angle$    |
|----------------|-----------|--------------|-------------|-------------|
| JOXZOL (X-ray) | Te        | I            | 3.679/3.862 | 173.3/169.2 |
| JOXZOL (Opt.)  | Te        | I            | 3.727/3.732 | 171.4/171.5 |

## Additional information regarding the selected X-ray structures

### JOXZOL

This structure corresponds to the *trans*-di-iodo-bis(methyl-phenyl-tellurido)-platinum(II), which exhibits a solid state architecture composed by discrete square-planar *trans* molecules, where the methyl phenyl telluride ligands with the stereochemically active lone pair adopt the RR (and SS) configuration. The authors observed a preference for the *trans* conformation, which was originally attributed to the use of heavy halogens (I) as coligands.

### PUYWUC

This structure corresponds to a selenoether functionalized tertiary phosphine. In the original work, the authors remarked the variation of the dihedral angle between the phenyl/phenylene rings attached to Se owing to its potential interaction with the Pt metal center, resulting in weak intermolecular Se···Pt interactions. Also, the authors were intrigued about possible attractive interactions between the Se and Cl atoms belonging to two neighboring units, stating that their interatomic distance was significantly shorter than the sum of their van der Waals radii.

### ROXFOB

This structure crystallized in a distorted square planar geometry around a Pd metal center, thus forming a five membered chelate ring. The authors highlighted the contribution of the Cl···H(aromatic), Cl···H (–OCH<sub>3</sub>) and Cl···Te interactions in the formation of a three dimensional network.

## Cartesian coordinates of complexes 1 to 8

### 1

|   |            |            |            |
|---|------------|------------|------------|
| C | 0.3352470  | -1.3458533 | -0.5623259 |
| C | 0.1691118  | -0.6817133 | 0.6467251  |
| C | -0.1691118 | 0.6817133  | 0.6467251  |

|    |            |            |            |
|----|------------|------------|------------|
| C  | -0.3352470 | 1.3458533  | -0.5623259 |
| C  | -0.1685559 | 0.6708619  | -1.7662357 |
| C  | 0.1685559  | -0.6708619 | -1.7662357 |
| H  | 0.5850955  | -2.3997799 | -0.5564025 |
| H  | -0.5850955 | 2.3997799  | -0.5564025 |
| H  | -0.2981141 | 1.2016364  | -2.7022305 |
| H  | 0.2981141  | -1.2016364 | -2.7022305 |
| Se | -0.4739766 | 1.6529463  | 2.2565979  |
| Se | 0.4739766  | -1.6529463 | 2.2565979  |
| F  | 1.2173527  | 1.9125354  | 2.6838715  |
| F  | -1.2173527 | -1.9125354 | 2.6838715  |

## 2

|    |            |            |            |
|----|------------|------------|------------|
| C  | 0.3569074  | -1.3396738 | -0.6122117 |
| C  | 0.1794580  | -0.6787384 | 0.5990280  |
| C  | -0.1794580 | 0.6787384  | 0.5990280  |
| C  | -0.3569074 | 1.3396738  | -0.6122117 |
| C  | -0.1794243 | 0.6678118  | -1.8165692 |
| C  | 0.1794243  | -0.6678118 | -1.8165692 |
| H  | 0.6223006  | -2.3901538 | -0.6150726 |
| H  | -0.6223006 | 2.3901538  | -0.6150726 |
| H  | -0.3178894 | 1.1967839  | -2.7524273 |
| H  | 0.3178894  | -1.1967839 | -2.7524273 |
| Te | -0.5285886 | 1.7497482  | 2.3775901  |
| Te | 0.5285886  | -1.7497482 | 2.3775901  |
| F  | 1.3252088  | 1.9657173  | 2.8196626  |
| F  | -1.3252088 | -1.9657173 | 2.8196626  |

## 3

|    |            |            |            |
|----|------------|------------|------------|
| C  | 0.2568538  | -1.3691376 | -1.3619290 |
| C  | 0.1306025  | -0.6841230 | -0.1611536 |
| C  | -0.1306025 | 0.6841230  | -0.1611536 |
| C  | -0.2568538 | 1.3691376  | -1.3619290 |
| C  | -0.1296334 | 0.6813115  | -2.5604096 |
| C  | 0.1296334  | -0.6813115 | -2.5604096 |
| H  | 0.4560144  | -2.4346372 | -1.3614488 |
| H  | -0.4560144 | 2.4346372  | -1.3614488 |
| H  | -0.2298395 | 1.2151708  | -3.4977696 |
| H  | 0.2298395  | -1.2151708 | -3.4977696 |
| Se | -0.3352239 | 1.6699106  | 1.4761313  |
| Se | 0.3352239  | -1.6699106 | 1.4761313  |
| F  | -2.0776291 | 1.7810497  | 1.3554551  |
| F  | 2.0776291  | -1.7810497 | 1.3554551  |
| Pd | 0.0000000  | 0.0000000  | 3.0645695  |
| Cl | -0.3512068 | 1.6838620  | 4.5788395  |
| Cl | 0.3512068  | -1.6838620 | 4.5788395  |

## 4

|   |            |            |            |
|---|------------|------------|------------|
| C | 0.2421280  | -1.3679237 | -1.4258950 |
| C | 0.1254471  | -0.6871495 | -0.2184054 |
| C | -0.1254471 | 0.6871495  | -0.2184054 |

|    |            |            |            |
|----|------------|------------|------------|
| C  | -0.2421280 | 1.3679237  | -1.4258950 |
| C  | -0.1219873 | 0.6821612  | -2.6267329 |
| C  | 0.1219873  | -0.6821612 | -2.6267329 |
| H  | 0.4294908  | -2.4363211 | -1.4378664 |
| H  | -0.4294908 | 2.4363211  | -1.4378664 |
| H  | -0.2154762 | 1.2181585  | -3.5637760 |
| H  | 0.2154762  | -1.2181585 | -3.5637760 |
| Te | -0.3333120 | 1.7981982  | 1.5844419  |
| Te | 0.3333120  | -1.7981982 | 1.5844419  |
| F  | -2.2268220 | 1.8327826  | 1.4360945  |
| F  | 2.2268220  | -1.8327826 | 1.4360945  |
| Pd | 0.0000000  | 0.0000000  | 3.2171071  |
| Cl | -0.3716345 | 1.8144011  | 4.6435856  |
| Cl | 0.3716345  | -1.8144011 | 4.6435856  |

## 5

|    |            |            |            |
|----|------------|------------|------------|
| C  | 0.0934443  | -1.3802742 | -1.0951687 |
| C  | 0.0428087  | -0.6982659 | 0.1173130  |
| C  | -0.0428087 | 0.6982659  | 0.1173130  |
| C  | -0.0934443 | 1.3802742  | -1.0951687 |
| C  | -0.0533179 | 0.6910673  | -2.2960387 |
| C  | 0.0533179  | -0.6910673 | -2.2960387 |
| H  | 0.1611119  | -2.4614155 | -1.0902098 |
| H  | -0.1611119 | 2.4614155  | -1.0902098 |
| H  | -0.0938848 | 1.2377812  | -3.2308704 |
| H  | 0.0938848  | -1.2377812 | -3.2308704 |
| Se | -0.1823626 | 1.7684258  | 1.7012359  |
| Se | 0.1823626  | -1.7684258 | 1.7012359  |
| F  | -1.8497968 | 2.2899919  | 1.3358555  |
| F  | 1.8497968  | -2.2899919 | 1.3358555  |
| C  | -2.3129151 | -0.8542774 | 2.1420072  |
| C  | 2.3129151  | 0.8542774  | 2.1420072  |
| O  | -3.3448077 | -0.5112638 | 2.4158759  |
| O  | 3.3448077  | 0.5112638  | 2.4158759  |

## 6

|    |            |            |            |
|----|------------|------------|------------|
| C  | -0.1551862 | -1.3651176 | -0.7433965 |
| C  | -0.0903483 | -0.6990356 | 0.4859998  |
| C  | 0.0903483  | 0.6990356  | 0.4859998  |
| C  | 0.1551862  | 1.3651176  | -0.7433965 |
| C  | 0.0674384  | 0.6912891  | -1.9452769 |
| C  | -0.0674384 | -0.6912891 | -1.9452769 |
| H  | -0.2634095 | -2.4433510 | -0.7317532 |
| H  | 0.2634095  | 2.4433510  | -0.7317532 |
| H  | 0.1211819  | 1.2480656  | -2.8761978 |
| H  | -0.1211819 | -1.2480656 | -2.8761978 |
| Se | 0.2985172  | 1.8441051  | 2.0214551  |
| Se | -0.2985172 | -1.8441051 | 2.0214551  |
| F  | 1.3520241  | 0.6633562  | 2.9404830  |
| F  | -1.3520241 | -0.6633562 | 2.9404830  |
| Br | -1.1870382 | 4.1613725  | 0.8486866  |

|    |           |            |           |
|----|-----------|------------|-----------|
| Br | 1.1870382 | -4.1613725 | 0.8486866 |
|----|-----------|------------|-----------|

### 7

|    |            |            |            |
|----|------------|------------|------------|
| C  | 0.0111929  | -1.3918109 | -1.6903005 |
| C  | 0.0052210  | -0.6951987 | -0.4903181 |
| C  | -0.0052210 | 0.6951987  | -0.4903181 |
| C  | -0.0111929 | 1.3918109  | -1.6903005 |
| C  | -0.0083373 | 0.6933082  | -2.8892785 |
| C  | 0.0083373  | -0.6933082 | -2.8892785 |
| H  | 0.0181845  | -2.4756967 | -1.6888214 |
| H  | -0.0181845 | 2.4756967  | -1.6888214 |
| H  | -0.0143693 | 1.2371087  | -3.8262274 |
| H  | 0.0143693  | -1.2371087 | -3.8262274 |
| Se | -0.0500996 | 1.7061906  | 1.1472834  |
| Se | 0.0500996  | -1.7061906 | 1.1472834  |
| F  | -1.7723429 | 2.0427674  | 1.0166610  |
| F  | 1.7723429  | -2.0427674 | 1.0166610  |
| Pd | 0.0000000  | -0.0000000 | 2.7509775  |
| Cl | -0.0090455 | 1.7249409  | 4.2639749  |
| Cl | 0.0090455  | -1.7249409 | 4.2639749  |
| C  | -2.7885974 | -1.0674824 | 1.2547823  |
| C  | 2.7885974  | 1.0674824  | 1.2547823  |
| O  | -3.8335927 | -0.7689184 | 1.5267554  |
| O  | 3.8335927  | 0.7689184  | 1.5267554  |

### 8

|    |            |            |            |
|----|------------|------------|------------|
| C  | 0.1885676  | -1.3726217 | -1.5045605 |
| C  | 0.0919593  | -0.6858150 | -0.3006753 |
| C  | -0.0919593 | 0.6858150  | -0.3006753 |
| C  | -0.1885676 | 1.3726217  | -1.5045605 |
| C  | -0.0955837 | 0.6885881  | -2.7040069 |
| C  | 0.0955837  | -0.6885881 | -2.7040069 |
| H  | 0.3209286  | -2.4484223 | -1.4910202 |
| H  | -0.3209286 | 2.4484223  | -1.4910202 |
| H  | -0.1697325 | 1.2302998  | -3.6416841 |
| H  | 0.1697325  | -1.2302998 | -3.6416841 |
| Se | -0.2945205 | 1.6831064  | 1.3392605  |
| Se | 0.2945205  | -1.6831064 | 1.3392605  |
| F  | -2.1406591 | 1.4888106  | 1.1688845  |
| F  | 2.1406591  | -1.4888106 | 1.1688845  |
| Pd | 0.0000000  | 0.0000000  | 2.9900353  |
| Cl | -0.3144785 | 1.6934062  | 4.5802391  |
| Cl | 0.3144785  | -1.6934062 | 4.5802391  |
| Br | -2.3265786 | -2.2498923 | 1.0585454  |
| Br | 2.3265786  | 2.2498923  | 1.0585454  |

### Cartesian coordinates of JOZXOL (Optimized dimer)

|    |            |            |            |
|----|------------|------------|------------|
| Pt | -1.0550482 | -1.2428088 | 0.0243163  |
| I  | -2.3349546 | -0.3396908 | -2.0899117 |
| I  | 0.0374256  | -2.3577805 | 2.1425128  |

|    |            |            |            |
|----|------------|------------|------------|
| Te | -2.8764587 | 0.0861165  | 1.3036416  |
| Te | 0.5482103  | -2.8235066 | -1.2584945 |
| C  | -4.3917530 | -1.3820722 | 1.0677798  |
| C  | -4.1075878 | -2.7213889 | 1.3091415  |
| C  | -5.0994516 | -3.6743070 | 1.1375936  |
| C  | -6.3668779 | -3.2958716 | 0.7145282  |
| C  | -6.6440060 | -1.9605417 | 0.4655813  |
| C  | -5.6569619 | -0.9996097 | 0.6439728  |
| C  | -2.6525221 | -0.3137985 | 3.3844221  |
| C  | -0.6385724 | -4.5714069 | -1.0501824 |
| C  | -0.0265809 | -5.7780120 | -0.7386759 |
| C  | -0.7960843 | -6.9259387 | -0.5990915 |
| C  | -2.1701879 | -6.8663820 | -0.7739981 |
| C  | -2.7786558 | -5.6571610 | -1.0839506 |
| C  | -2.0172425 | -4.5063609 | -1.2177866 |
| C  | 0.1170931  | -2.6555959 | -3.3387945 |
| H  | -3.1102734 | -3.0258610 | 1.6084691  |
| H  | -4.8736167 | -4.7180256 | 1.3253374  |
| H  | -7.1385189 | -4.0445263 | 0.5751615  |
| H  | -7.6303558 | -1.6616667 | 0.1293636  |
| H  | -5.8766714 | 0.0429393  | 0.4418609  |
| H  | -1.7156345 | 0.1398063  | 3.6999586  |
| H  | -2.6269365 | -1.3895802 | 3.5370640  |
| H  | -3.5011359 | 0.1400798  | 3.8944086  |
| H  | 1.0473590  | -5.8285539 | -0.5962882 |
| H  | -0.3178179 | -7.8668770 | -0.3518412 |
| H  | -2.7695081 | -7.7631799 | -0.6653056 |
| H  | -3.8535840 | -5.6024546 | -1.2141301 |
| H  | -2.4992785 | -3.5589053 | -1.4342775 |
| H  | 0.4206371  | -1.6593326 | -3.6522682 |
| H  | -0.9501459 | -2.7963965 | -3.4885185 |
| H  | 0.6952336  | -3.4230946 | -3.8515986 |
| Pt | 1.0550482  | 1.2428088  | 0.0243163  |
| I  | 2.3349546  | 0.3396908  | -2.0899117 |
| I  | -0.0374256 | 2.3577805  | 2.1425128  |
| Te | 2.8764587  | -0.0861165 | 1.3036416  |
| Te | -0.5482103 | 2.8235066  | -1.2584945 |
| C  | 4.3917530  | 1.3820722  | 1.0677798  |
| C  | 4.1075878  | 2.7213889  | 1.3091415  |
| C  | 5.0994516  | 3.6743070  | 1.1375936  |
| C  | 6.3668779  | 3.2958716  | 0.7145282  |
| C  | 6.6440060  | 1.9605417  | 0.4655813  |
| C  | 5.6569619  | 0.9996097  | 0.6439728  |
| C  | 2.6525221  | 0.3137985  | 3.3844221  |
| C  | 0.6385724  | 4.5714069  | -1.0501824 |
| C  | 0.0265809  | 5.7780120  | -0.7386759 |
| C  | 0.7960843  | 6.9259387  | -0.5990915 |
| C  | 2.1701879  | 6.8663820  | -0.7739981 |
| C  | 2.7786558  | 5.6571610  | -1.0839506 |
| C  | 2.0172425  | 4.5063609  | -1.2177866 |
| C  | -0.1170931 | 2.6555959  | -3.3387945 |

|   |            |            |            |
|---|------------|------------|------------|
| H | 3.1102734  | 3.0258610  | 1.6084691  |
| H | 4.8736167  | 4.7180256  | 1.3253374  |
| H | 7.1385189  | 4.0445263  | 0.5751615  |
| H | 7.6303558  | 1.6616667  | 0.1293636  |
| H | 5.8766714  | -0.0429393 | 0.4418609  |
| H | 1.7156345  | -0.1398063 | 3.6999586  |
| H | 2.6269365  | 1.3895802  | 3.5370640  |
| H | 3.5011359  | -0.1400798 | 3.8944086  |
| H | -1.0473590 | 5.8285539  | -0.5962882 |
| H | 0.3178179  | 7.8668770  | -0.3518412 |
| H | 2.7695081  | 7.7631799  | -0.6653056 |
| H | 3.8535840  | 5.6024546  | -1.2141301 |
| H | 2.4992785  | 3.5589053  | -1.4342775 |
| H | -0.4206371 | 1.6593326  | -3.6522682 |
| H | 0.9501459  | 2.7963965  | -3.4885185 |
| H | -0.6952336 | 3.4230946  | -3.8515986 |
